# Supplementary material for: Ubenimex Reverses MDR in Gastric Cancer Cells by Activating Caspase-3-Mediated Apoptosis and Suppressing the Expression of Membrane Transport Proteins
Source: PubMed Central journal article supplement (PMC6402206; doi:10.1155/2019/4390839), 2019-02-20
Supplement: 4390839.f1.pdf [file 4390839.f1.pdf]

Supplementary Table S1 The siRNA duplexes target human CD13 in pTZU-CD13-shRNA

|                      |              |                                                        |
|----------------------|--------------|--------------------------------------------------------|
| <b>CD13 siRNA-p1</b> | <b>Tgac</b>  | <b>GCAGCAGGTAAGAAGTCATTCAAGAGATGACTTCTTACCTGCTGC t</b> |
| <b>CD13 siRNA-p2</b> | <b>Ctaga</b> | <b>GCAGCAGGTAAGAAGTCATCTCTTGATAGACTTCTTACCTGCTGC g</b> |

Supplementary Table S2 The coding sequence of human CD13 in pEGFP-N1-CD13

|                      |                                       |
|----------------------|---------------------------------------|
| HCD13-sacI-NF:       | TATGAGCTCATGACACCGGAGTTTGACGA         |
| HCD13-SOE1-reverse   | CTGTTGAGTTTTGGATAAACACTGCGG           |
| HCD13-AgeI-NR:       | GACACCGTTTACTTTTCTTCTATCTCATTTTTATTTC |
| HCD13- SOE2-forward: | CCGCAGTGTATCCAAAACACTCAACAG           |

Supplementary Table S3. IC50 (ug/ml) and RIs of human MDR GC cells towards  
with different chemotherapeutic drugs

| Drugs          | SGC7901   |    | SGC7901/X    |              | MKN-45       |    | MKN-45/X      |              |
|----------------|-----------|----|--------------|--------------|--------------|----|---------------|--------------|
|                | IC50      | RI | IC50         | RI           | IC50         | RI | IC50          | RI           |
| 5-fluorouracil | 22.5±0.02 | 1  | 189.9±0.4**  | 8.34±0.03**  | 20.68±0.01   | 1  | 148.21±0.03** | 7.15±0.01**  |
| Cisplatin      | 1.23±0.01 | 1  | 19.20±0.11** | 18.21±0.01** | 0.38±0.02    | 1  | 8.23±0.01**   | 21.65±0.02** |
| Oxaliplatin    | 0.41±0.03 | 1  | 8.34±0.02**  | 20.81±0.12** | 19.84±0.02** | 1  | 124.32±0.01** | 6.26±0.01**  |

IC50 values and RIs were determined by the CCK-8 method. Data are expressed as means ± SD. \*\*P < 0.01 versus the parental cells.
